# Supplementary material
Source: Atypon-hosted journal article supplement (https://static.yanyin.tech/literature/current_protocol/10.1002/cpz1.311/attachments/downloadSupplement)
Supplement: downloadSupplement [file downloadSupplement]

## Sheet: Sheet1
Product	Protein sequence	Coding sequence
G5 tag	GGGGG	GGAGGCGGAGGAGGC
Myc tag	EQKLISEEDL	GAACAAAAACTTATTTCTGAAGAAGATCTG
CD40	MVSLPRLCALWGCLLTAVHLGQCVTCSDKQYLHDGQCCDLCQPGSRLTSHCTALEKTQCHPCDSGEFSAQWNREIRCHQHRHCEPNQGLRVKKEGTAESDTVCTCKEGQHCTSKDCEACAQHTPCIPGFGVMEMATETTDTVCHPCPVGF FSNQSSLFEKCYPWTSCEDKNLEVLQKGTSQTNVICGLKSRMRALLVIPVVMGILITIFGVFLYIKKVVKKPKDNEMLPPAARRQDPQEMEDYPGHNTAAPVQETLHGCQPVTQEDGKESRISVQERQVTDSIALRPLV	ATGGTGTCTTTGCCTCGGCTGTGCGCGCTATGGGGCTGCTTGTTGACAGCGGTCCATCTAGGGCAGTGTGTTACGTGCAGTGACAAACAGTACCTCCACGATGGCCAGTGCTGTGATTTGTGCCAGCCAGGAAGCCGACTGACAAGCCACTGCACAGCTCTTGAGAAGACCCAATGCCACCCATGTGACTCAGGCGAATTCTCAGCCCAGTGGAACAGGGAGATTCGCTGTCACCAGCACAGACACTGTGAACCCAATCAAGGGCTTCGGGTTAAGAAGGAGGGCACCGCAGAATCAGACACTGTCTGTACCTGTAAGGAAGGACAACACTGCACCAGCAAGGATTGCGAGGCATGTGCTCAGCACACGCCCTGTATCCCTGGCTTTGGAGTTATGGAG…
G5-Myc-CD40	MVSLPRLCALWGCLLTAVHLGQCGGGGGEQKLISEEDLVTCSDKQYLHDGQCCDLCQPGSRLTSHCTALEKTQCHPCDSGEFSAQWNREIRCHQHRHCEPNQGLRVKKEGTAESDTVCTCKEGQHCTSKDCEACAQHTPCIPGFGVMEMATETTDTVCHPCPVGFFSNQSSLFEKCYPWTSCEDKNLEVLQKGTSQTNVICGLKSRMRALLVIPVVMGILITIFGVFLYIKKVVKKPKDNEMLPPAARRQDPQEMEDYPGHNTAAPVQETLHGCQPVTQEDGKESRISVQERQVTDSIALRPLV	ATGGTGTCTTTGCCTCGGCTGTGCGCGCTATGGGGCTGCTTGTTGACAGCGGTCCATCTAGGGCAGTGTGGAGGCGGAGGAGGCGAACAAAAACTTATTTCTGAAGAAGATCTGGTTACGTGCAGTGACAAACAGTACCTCCACGATGGCCAGTGCTGTGATTTGTGCCAGCCAGGAAGCCGACTGACAAGCCACTGCACAGCTCTTGAGAAGACCCAATGCCACCCATGTGACTCAGGCGAATTCTCAGCCCAGTGGAACAGGGAGATTCGCTGTCACCAGCACAGACACTGTGAACCCAATCAAGGGCTTCGGGTTAAGAAGGAGGGCACCGCAGAATCAGACACTGTCTGTACCTGTAAGGAAGGACAACACTGCACCAGCAAGGATTGCGAGGCA…
FLAG tag	GSGDYKDDDDK	ggatccggaGACTACAAGGATGACGATGACAAA
SrtA	QAKPQIPKDKSKVAGYIEIPDADIKEPVYPGPATSEQLNRGVSFAEENES LDDQNISIAGHTFIDRPNYQFTNLKAAKKGSMVYFKVGNETRKYKMTSIR NVKPTDVGVLDEQKGKDKQLTLITCDDYNEKTGVWETRKIFVATEVK	CAAGCTAAACCTCAAATTCCGAAAGATAAATCGAAAGTGGCAGGCTATATTGAAATTCCAGATGCTGATATTAAAGAACCAGTATATCCAGGACCAGCAACATCCGAACAATTAAATAGAGGTGTAAGCTTTGCAGAAGAAAATGAATCACTAGATGATCAAAATATTTCAATTGCAGGACACACTTTCATTGACCGTCCGAACTATCAATTTACAAATCTTAAAGCAGCCAAAAAAGGTAGTATGGTGTACTTTAAAGTTGGTAATGAAACACGTAAGTATAAAATGACAAGTATAAGAAACGTTAAGCCTACAGATGTAGGAGTTCTAGATGAACAAAAAGGTAAAGATAAACAATTAACATTAATTACTTGTGATGATTACAATGAAAAGACAGGC…
Linker	GSTSGSGKPGSGEGSTKGSTSGSGKPGSGDGSTK	GGTAGCACCAGCGGCAGCGGCAAGCCCGGCAGCGGCGAGGGCAGCACCAAGGGCAGTACTAGTGGAAGTGGTAAACCTGGAAGTGGAGATGGGAGTACGAAA
CD40L	MIETYSQPSPRSVATGLPASMKIFMYLLTVFLITQMIGSVLFAVYLHRRLDKVEEEVNLHEDFVFIKKLKRCNKGEGSLSLLNCEEMRRQFEDLVKDITLNKEEKKENSFEMQRGDEDPQIAAHVVSEANSNAASVLQWAKKGYYTMKSNLVMLENGKQLTVKREGLYYVYTQVTFCSNREPSSQRPFIVGLWLKPSSGSERILLKAANTHSSSQLCEQQSVHLGGVFELQAGASVFVNVTEASQVIHRVGFSSFGLLKL	ATGATAGAAACATACAGCCAACCTTCCCCCAGATCCGTGGCAACTGGACTTCCAGCGAGCATGAAGATTTTTATGTATTTACTTACTGTTTTCCTTATCACCCAAATGATTGGATCTGTGCTTTTTGCTGTGTATCTTCATAGAAGATTGGATAAGGTCGAAGAGGAAGTAAACCTTCATGAAGATTTTGTATTCATAAAAAAGCTAAAGAGATGCAACAAAGGAGAAGGATCTTTATCCTTGCTGAACTGTGAGGAGATGAGAAGGCAATTTGAAGACCTTGTCAAGGATATAACGTTAAACAAAGAAGAGAAAAAAGAAAACAGCTTTGAAATGCAAAGAGGTGATGAGGATCCTCAAATTGCAGCACACGTTGTAAGCGAAGCCAACAGTAATGCA…
CD40L-linker-SrtA-FLAG	MIETYSQPSPRSVATGLPASMKIFMYLLTVFLITQMIGSVLFAVYLHRRLDKVEEEVNLHEDFVFIKKLKRCNKGEGSLSLLNCEEMRRQFEDLVKDITLNKEEKKENSFEMQRGDEDPQIAAHVVSEANSNAASVLQWAKKGYYTMKSNLVMLENGKQLTVKREGLYYVYTQVTFCSNREPSSQRPFIVGLWLKPSSGSERILLKAANTHSSSQLCEQQSVHLGGVFELQAGASVFVNVTEASQVIHRVGFSSFGLLKLGSTSGSGKPGSGEGSTKGSTSGSGKPGSGDGSTKQAKPQIPKDKSKVAGYIEIPDADIKEPVYPGPATSEQLNRGVSFAEENESLDDQNI SIAGHTFIDRPNYQFTNLKAAKKGSMVYFKVGNETRKYKMTSIRNVKP…	ATGATAGAAACATACAGCCAACCTTCCCCCAGATCCGTGGCAACTGGACTTCCAGCGAGCATGAAGATTTTTATGTATTTACTTACTGTTTTCCTTATCACCCAAATGATTGGATCTGTGCTTTTTGCTGTGTATCTTCATAGAAGATTGGATAAGGTCGAAGAGGAAGTAAACCTTCATGAAGATTTTGTATTCATAAAAAAGCTAAAGAGATGCAACAAAGGAGAAGGATCTTTATCCTTGCTGAACTGTGAGGAGATGAGAAGGCAATTTGAAGACCTTGTCAAGGATATAACGTTAAACAAAGAAGAGAAAAAAGAAAACAGCTTTGAAATGCAAAGAGGTGATGAGGATCCTCAAATTGCAGCACACGTTGTAAGCGAAGCCAACAGTAATGCA…
